# Supplementary material for: Autism Spectrum Disorders and Malocclusions: Systematic Review and Meta-Analyses
Source: MDPI journal article supplement (doi:10.3390/jcm11102727), 2022-05-11
Supplement: s1 [file s1]

## Online Supplemental Information

### Summary

|                                                                                                                                                                                                     |          |
|-----------------------------------------------------------------------------------------------------------------------------------------------------------------------------------------------------|----------|
| <i>Table S1. List of potentially relevant studies not included in the systematic review, along with the reasons for exclusion.....</i>                                                              | <i>2</i> |
| <i>Table S2. Quality assessment of Selected Full Text Article. ....</i>                                                                                                                             | <i>4</i> |
| <i>Figure S1. Forest plots for Odds Ratio of malocclusion of ASD versus control group.....</i>                                                                                                      | <i>5</i> |
| <i>Figure S2. Forest plots for Odds Ratio of overjet of ASD versus control group. Subgroup analysis according to the increased, normal and decreased overjet. ....</i>                              | <i>5</i> |
| <i>Figure S3. Forest plots for Odds Ratio of Class I of ASD versus control group. ....</i>                                                                                                          | <i>5</i> |
| <i>Figure S4. Forest plots for Odds Ratio of Class II of ASD versus control group. ....</i>                                                                                                         | <i>6</i> |
| <i>Figure S5. Forest plots for Odds Ratio of Class III of ASD versus control group. ....</i>                                                                                                        | <i>6</i> |
| <i>Figure S6. Forest plots for Odds Ratio of crossbite of ASD versus control group. Subgroup analysis according to the anterior, posterior, and anterior + posterior crossbite.....</i>             | <i>6</i> |
| <i>Figure S7. Forest plots for Odds Ratio of overbite of ASD versus control group. Subgroup analysis according to the deep bite or increased overbite, and open bite or decreased overbite.....</i> | <i>7</i> |

Table S1. List of potentially relevant studies not included in the systematic review, along with the reasons for exclusion.

| Year | Reference                                                                                                                                                                                                                                                                                                                          | Reason               |
|------|------------------------------------------------------------------------------------------------------------------------------------------------------------------------------------------------------------------------------------------------------------------------------------------------------------------------------------|----------------------|
| 2021 | Kuter B, Uzel I. Evaluation of oral health status and oral disorders of children with autism spectrum disorders by gender. Arch Pediatr. 2021 Jan;28(1):33-38. doi: 10.1016/j.arcped.2020.10.009. Epub 2020 Nov 27. PMID: 33257211                                                                                                 | No occlusion data    |
| 2020 | Koskela A, Neittaanmäki A, Rönnerberg K, Palotie A, Ripatti S, Palotie T. The relation of severe malocclusion to patients' mental and behavioral disorders, growth, and speech problems. Eur J Orthod. 2021 Apr 3;43(2):159-164. doi: 10.1093/ejo/cjaa028.                                                                         | No ASD group         |
| 2020 | Bossù M, Trottini M, Corridore D, Di Giorgio G, Sfasciotti GL, Palaia G, Ottolenghi L, Polimeni A, Carlo SD. (2020). Oral Health Status of Children with Autism in Central Italy. Applied Sciences. 10. 2247. 10.3390/app10072247                                                                                                  | No occlusion data    |
| 2019 | Junior RCM, Rangel ML, Carvalho LGA, Figueiredo SC, Ribeiro ILA, Castro RD. Social, Educational and Dental Profiles of Brazilian Patients with Special Needs Attended at a Center for Dental Specialties. Pesquisa Brasileira em Odontopediatria e Clínica Integrada [online]. 2019, v. 19, e3819. doi: 10.4034/PBOCI.2019.191.55. | No occlusion data    |
| 2019 | Makkar A, Indushekar KR, Saraf BG, Sardana D, Sheoran N. A cross sectional study to evaluate the oral health status of children with intellectual disabilities in the National Capital Region of India (Delhi-NCR). J Intellect Disabil Res. 2019 Jan;63(1):31-39. doi: 10.1111/jir.12553.                                         | No occlusion data    |
| 2019 | Suhaib F, Saeed A, Gul H, Kaleem M. Oral assessment of children with autism spectrum disorder in Rawalpindi, Pakistan. Autism. 2019 Jan;23(1):81-86. doi: 10.1177/1362361317730299. Epub 2017 Oct 27. PMID: 29076744.                                                                                                              | No occlusion data    |
| 2018 | Naidoo M, Singh S. The Oral health status of children with autism Spectrum disorder in KwaZulu-Nata, South Africa. BMC Oral Health. 2018 Oct 12;18(1):165. doi: 10.1186/s12903-018-0632-1.                                                                                                                                         | No occlusion data    |
| 2017 | Nunes R, Simões PW, Pires PDS, Rosso MLP. Prevalência de alterações bucais em pessoas com deficiência na clínica da Universidade do Extremo Sul Catarinense. Revista de Odontologia da Universidade Cidade de São Paulo, [S.l.], v. 29, n. 2, p. 118 - 128, nov. 2017. ISSN 1983-5183.                                             | No occlusion data    |
| 2015 | Blomqvist My, Bejerot S, Dahllöf G. A cross-sectional study on oral health and dental care in intellectually able adults with autism spectrum disorder. BMC Oral Health. 2015 Jul 15;15:81. doi: 10.1186/s12903-015-0065-z.                                                                                                        | Adult's participants |
| 2014 | Khatib AAE, Tekeya MME, Tantawi MAE, Omar T. Oral health status and behaviours of children with Autism Spectrum Disorder: a case-control study. Int J Paediatr Dent. 2014 Jul;24(4):314-23. doi: 10.1111/ipd.12067.                                                                                                                | No occlusion data    |
| 2014 | Vellappally S, Gardens SJ, Al Kheraif AA, Krishna M, Babu S, Hashem M, Jacob V, Anil S. The prevalence of malocclusion and its association with dental caries among 12-18-year-old disabled adolescents. BMC Oral Health. 2014 Oct 1;14:123. doi: 10.1186/1472-6831-14-123.                                                        | No ASD group         |
| 2012 | Orellana L-M, Silvestre F-J, Martínez-Sanchis S, Martínez-Mihi V, Bautista D. Oral manifestations in a group of adults with autism spectrum disorder. Med Oral Patol Oral Cir Bucal. 2012 May 1;17(3):e415-9. doi: 10.4317/medoral.17573.                                                                                          | Adult's participants |
| 2011 | Jaber MA, Sayyab M, Abu Fanas SH. Oral health status and dental needs of autistic children and young adults. J Investig Clin Dent. 2011 Feb;2(1):57-62. doi: 10.1111/j.2041-1626.2010.00030.x.                                                                                                                                     | No occlusion data    |

|      |                                                                                                                                                                                             |                   |
|------|---------------------------------------------------------------------------------------------------------------------------------------------------------------------------------------------|-------------------|
| 2011 | Jaber MA. Dental caries experience, oral health status and treatment needs of dental patients with autism. J Appl Oral Sci. 2011 May-Jun;19(3):212-7. doi: 10.1590/s1678-77572011000300006. | No occlusion data |
| 2001 | Fahlvik-Planefeldt C, Herrström P. Dental care of autistic children within the non-specialized Public Dental Service. Swed Dent J. 2001;25(3):113-8.                                        | No occlusion data |

---

**Table S2.** Quality assessment of Selected Full Text Article.

| Author et al., Year            | Item 1 | Item 2 | Item 3 | Item 4 | Item 5 | Item 6 | Item 7 | Item 8 | Item 9 | Item 10 | Item 11 | Item 12 | Total | Quality assessment |
|--------------------------------|--------|--------|--------|--------|--------|--------|--------|--------|--------|---------|---------|---------|-------|--------------------|
| Bagattoni et al. 2021          | 1      | 1      | 1      | 1      | 1      | 1      | 1      | 0      | 0      | 1       | 1       | 1       | 10    | Medium quality     |
| Farmani et al. 2020            | 1      | 1      | 0      | 1      | 1      | 1      | 1      | 0      | 1      | 1       | 1       | 1       | 10    | Medium quality     |
| Kuter 2019                     | 1      | 1      | 0      | 0      | 0      | 1      | 0      | 1      | 0      | 0       | 1       | 1       | 7     | Medium quality     |
| Leiva-García et al. 2019       | 1      | 1      | 0      | 1      | 1      | 1      | 1      | 0      | 0      | 1       | 1       | 1       | 9     | Medium quality     |
| Önol & Kurzioğlu 2018          | 1      | 1      | 0      | 0      | 1      | 1      | 0      | 0      | 0      | 1       | 1       | 1       | 7     | Medium quality     |
| Fontaine-Sylvestre et al. 2017 | 1      | 1      | 0      | 1      | 1      | 1      | 0      | 0      | 1      | 1       | 1       | 1       | 9     | Medium quality     |
| Du et al. 2015                 | 1      | 1      | 1      | 0      | 0      | 1      | 1      | 0      | 0      | 1       | 1       | 1       | 9     | Medium quality     |
| Alkhabuli et al. 2019          | 1      | 1      | 0      | 0      | 1      | 1      | 1      | 0      | 0      | 0       | 0       | 0       | 5     | Low quality        |
| Alkhabra 2017                  | 1      | 1      | 0      | 0      | 1      | 1      | 0      | 0      | 0      | 1       | 0       | 0       | 5     | Low quality        |
| DeMattei et al. 2007           | 1      | 1      | 0      | 0      | 1      | 1      | 1      | 0      | 1      | 1       | 1       | 1       | 9     | Medium quality     |
| Luppanapornlarp et al. 2010    | 1      | 1      | 0      | 0      | 1      | 1      | 1      | 0      | 1      | 1       | 1       | 1       | 9     | Medium quality     |
| Orellana et al. 2019           | 1      | 1      | 0      | 1      | 1      | 1      | 1      | 0      | 0      | 1       | 1       | 1       | 9     | Medium quality     |
| Rekha et al. 2012              | 1      | 1      | 0      | 0      | 1      | 1      | 0      | 0      | 0      | 1       | 1       | 1       | 7     | Medium quality     |

Item1. Are the objectives clearly formulated?; Item 2. Are there key elements of study design early in the paper?; Item 3. Was the sample size calculated?; Item 4. Does the study report demographic characteristics of the study population?; Item 5. Were the sample selection criteria clearly described?; Item 6. Does the study describe specifications of material and methods involved including how and when measurements were taken?; Item 7. Was there a reliability assessment, with adequate level of agreement intraexaminer or/and interexaminer?; Item 8. Were there blinding measurements?; Item 9. Does the study give details of methods of assessment (measurements) for each variable of interest?; Item 10. Was there a complete and adequate reporting of results, with self-explanatory tables and figures?; Item 11. Was there a statistical analysis appropriate for data?; Item 12. Was the P-value stated or confidence intervals provided?

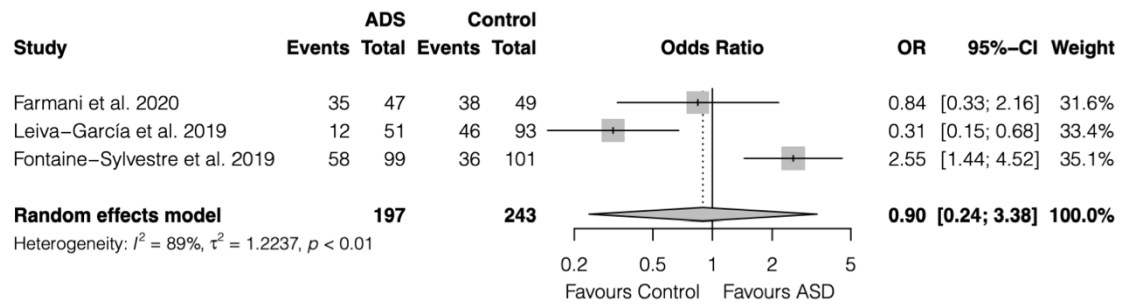

**Figure S1.** Forest plots for Odds Ratio of malocclusion of ASD versus control group.

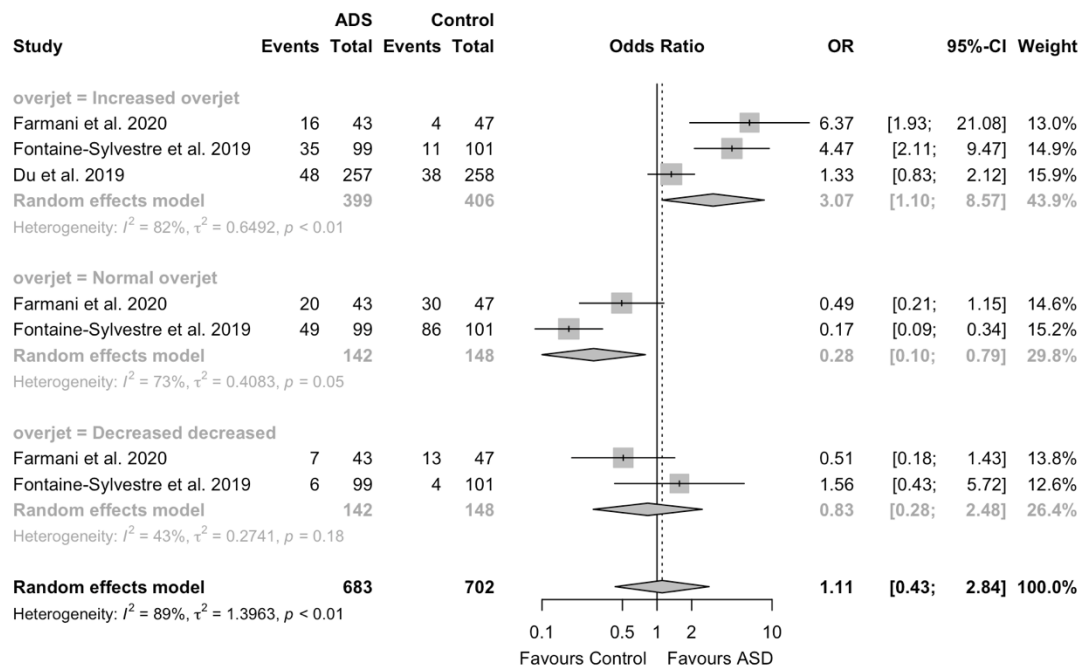

**Figure S2.** Forest plots for Odds Ratio of overjet of ASD versus control group. Subgroup analysis according to the increased, normal and decreased overjet.

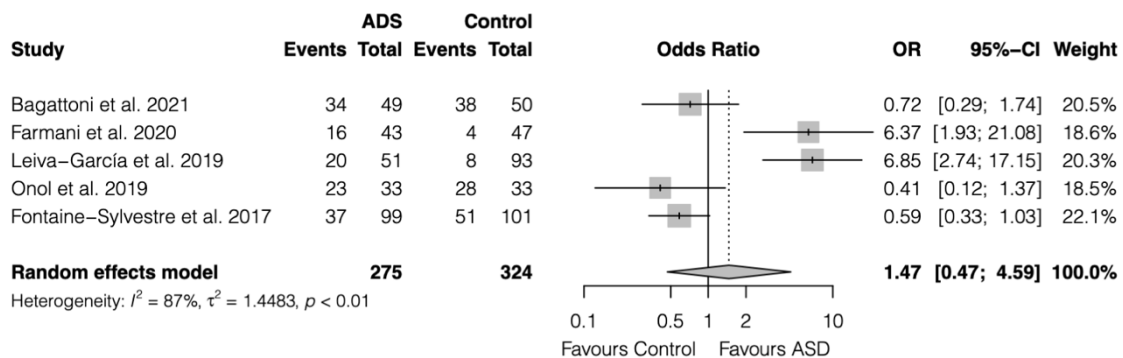

**Figure S3.** Forest plots for Odds Ratio of Class I of ASD versus control group.

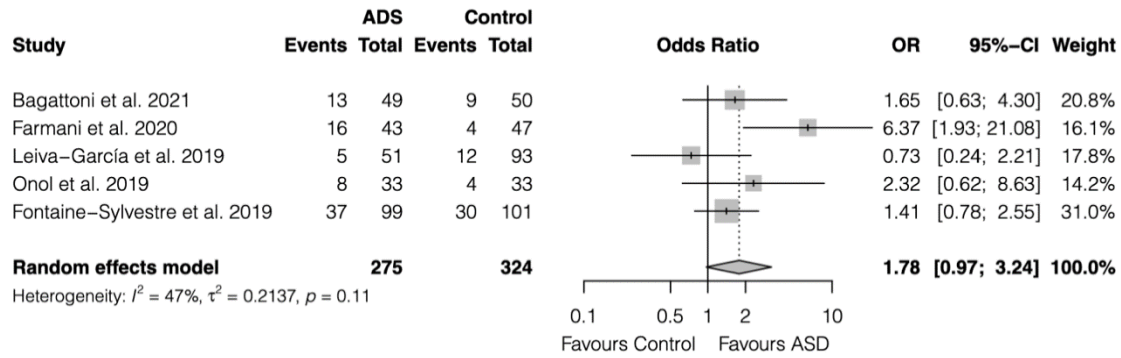

**Figure S4.** Forest plots for Odds Ratio of Class II of ASD versus control group.

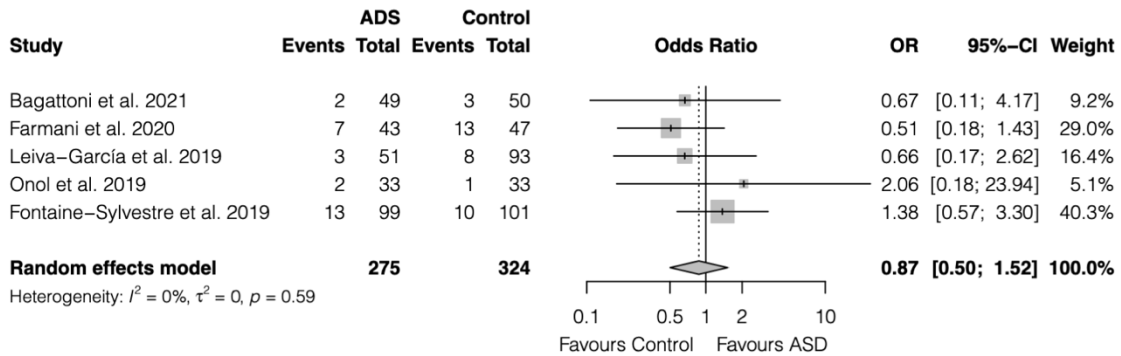

**Figure S5.** Forest plots for Odds Ratio of Class III of ASD versus control group.

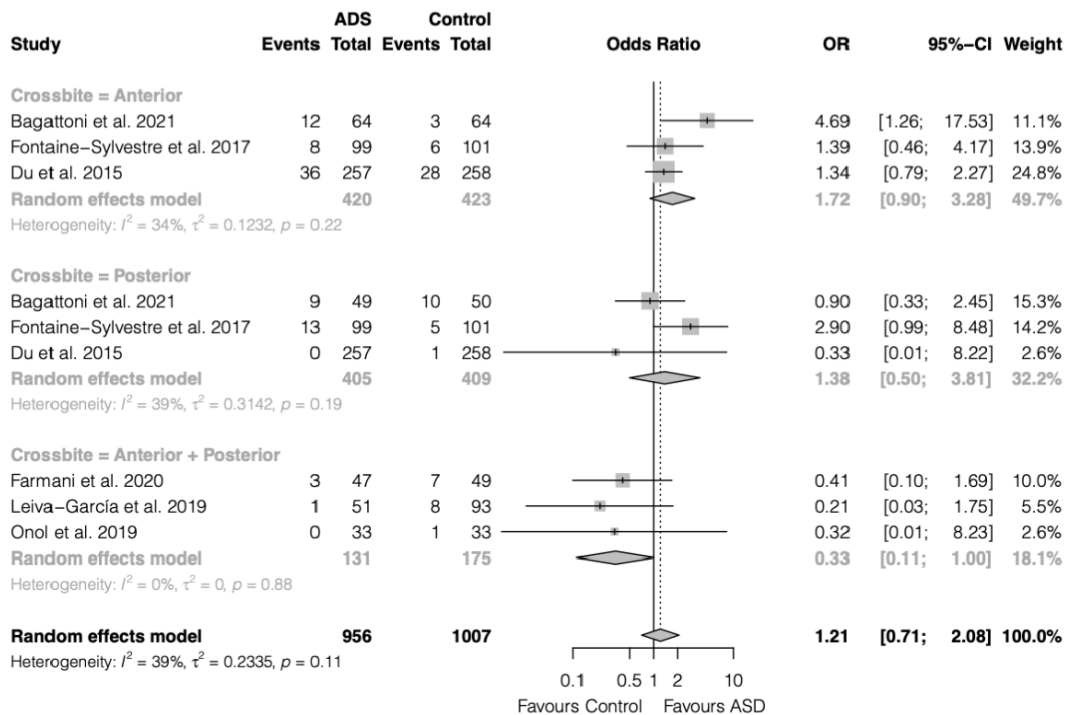

**Figure S6.** Forest plots for Odds Ratio of crossbite of ASD versus control group. Subgroup analysis according to the anterior, posterior, and anterior + posterior crossbite.

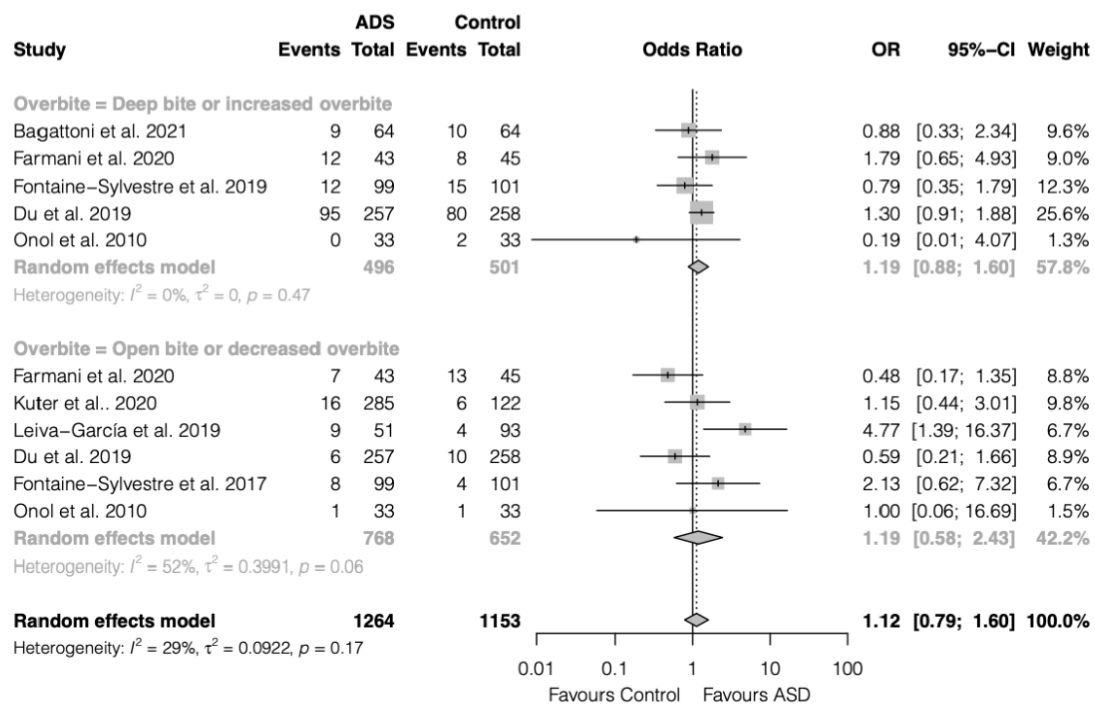

**Figure S7.** Forest plots for Odds Ratio of overbite of ASD versus control group. Subgroup analysis according to the deep bite or increased overbite, and open bite or decreased overbite.
